# Supplementary material for: Establishing and Optimizing a Bacterial Consortia for Effective Biodegradation of Petroleum Contaminants: Advancing Classical Microbiology via Experimental and Mathematical Approach
Source: MDPI journal article supplement (doi:10.3390/w13223311), 2021-11-22
Supplement: s1 [file s1]

## Supplementary Materials

# Establishing and Optimizing a Bacterial Consortia for Effective Biodegradation of Petroleum Contaminants: Advancing Classical Microbiology via Experimental and Mathematical Approach

Table S1. Range and levels of independent variables

| Variables | Low level | Medium level | High level |
|-----------|-----------|--------------|------------|
| Y1        | 1         | 1.5          | 2          |
| Y2        | 1         | 1.5          | 2          |
| Y4        | 1         | 1.5          | -          |
| Y5        | 1         | 1.5          | -          |
| Y6        | 1         | -            | 2          |
| Y7        | 1         | 1.5          | -          |
| Y8        | 1         | 1.5          | 2          |

Table S2. Biochemical activities of eight isolated strains

| Isolated | Gram stain | Methyl Red test | Starch hydrolysis test | Simmons Citrate test | Gelatin Hydrolysis | Catalase test |
|----------|------------|-----------------|------------------------|----------------------|--------------------|---------------|
| Y1       | -          | +               | -                      | -                    | -                  | +             |
| Y2       | +          | +               | +                      | +                    | -                  | +             |
| Y3       | -          | -               | -                      | -                    | -                  | +             |
| Y4       | +          | +               | -                      | +                    | +                  | +             |
| Y5       | +          | -               | -                      | -                    | +                  | +             |
| Y6       | +          | -               | +                      | -                    | -                  | +             |
| Y7       | +          | -               | +                      | -                    | +                  | +             |
| Y8       | +          | -               | +                      | +                    | +                  | +             |

Abbreviations: (-) = Negative activity; (+) = Positive activity
